# Supplementary material for: Dual Benefit of Rainwater Harvesting—High Temporal-Resolution Stochastic Modelling
Source: MDPI journal article supplement (doi:10.3390/w13172415), 2021-09-02
Supplement: s1 [file s1]

**Supplementary material**

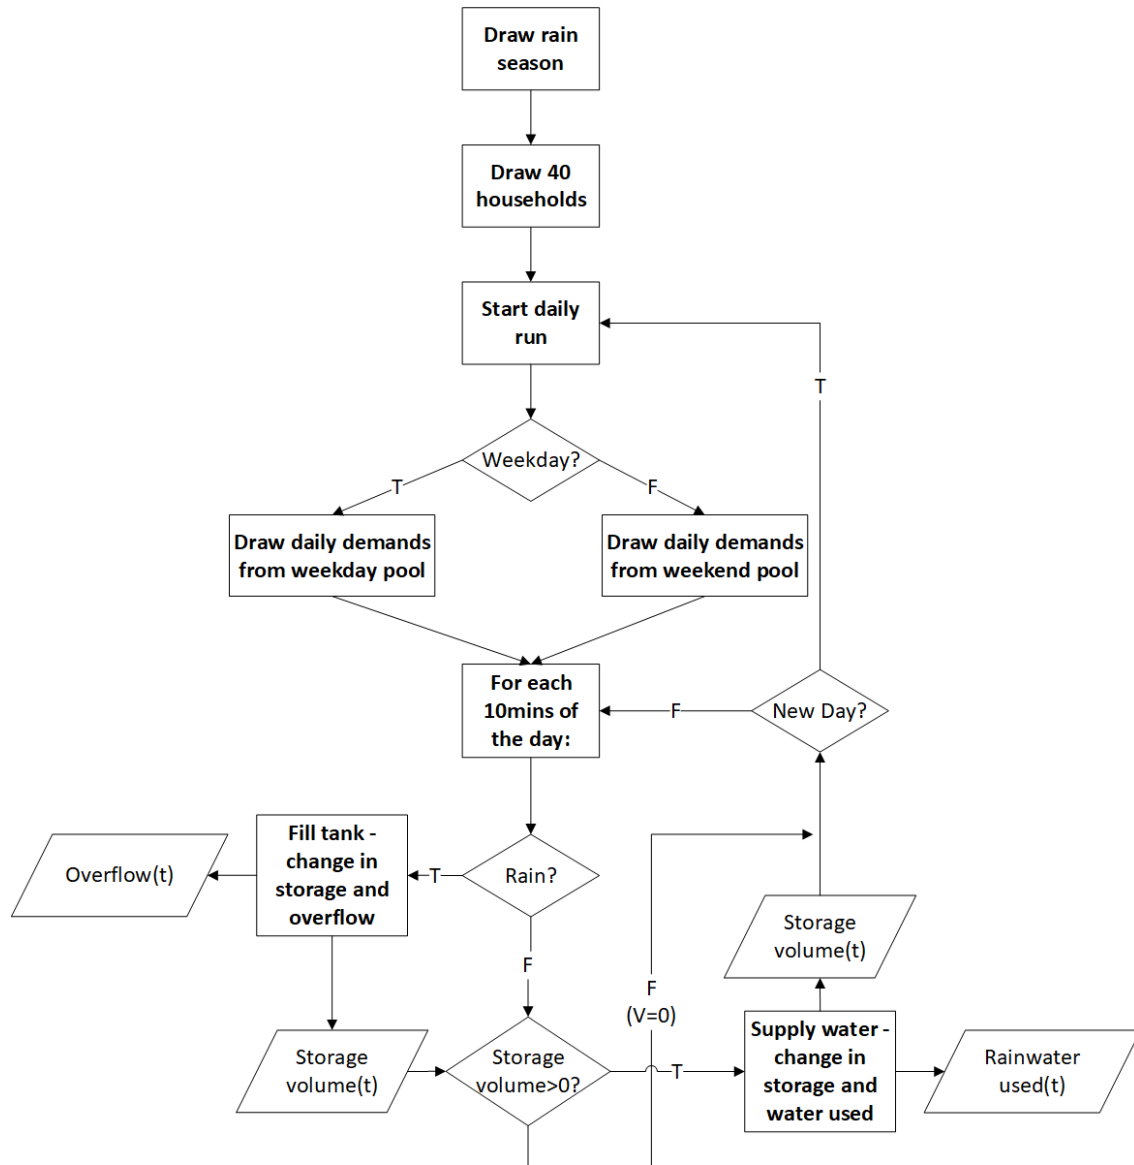

**Figure S1.** A Flowchart of the stochastic model of a single building RWH system

T – True; F – False
